# Supplementary material
Source: PubMed Central journal article supplement (PMC4554298)
Supplement: am5b05228_si_001.pdf [file am5b05228_si_001.pdf]

# Supporting Information

---

## **Terminal PEGylated DNA-Gold Nanoparticle Conjugates Offering High Resistance to Nuclease Degradation and Efficient Intracellular Delivery of DNA Binding Agents**

Lei Song,<sup>†</sup> Yuan Guo,<sup>†</sup> Deborah Roebuck,<sup>‡</sup> Chun Chen,<sup>§</sup> Min Yang,<sup>ϕ</sup> Zhongqiang Yang,<sup>§</sup> Sreejesh Sreedharan,<sup>ξ</sup> Caroline Glover,<sup>ξ</sup> Jim A. Thomas,<sup>ξ</sup> Dongsheng Liu,<sup>§</sup> Shengrong Guo,<sup>†,\*</sup> Rongjun Chen,<sup>‡,\*</sup> and Dejian Zhou<sup>†,\*</sup>

<sup>†</sup> *School of Chemistry and Astbury Structure for Molecular Biology, University of Leeds, Leeds LS2 9JT, UK. Email: [s.guo@leeds.ac.uk](mailto:s.guo@leeds.ac.uk) (S.G.) or [d.zhou@leeds.ac.uk](mailto:d.zhou@leeds.ac.uk) (D.Z.)*

<sup>‡</sup> *Department of Chemical Engineering, Imperial College London, South Kensington Campus, London SW7 2AZ, UK. Email: [rongjun.chen@imperial.co.uk](mailto:rongjun.chen@imperial.co.uk) (R.C.)*

<sup>§</sup> *Department of Chemistry, Tsinghua University, Beijing 100084, P. R. China.*

<sup>ϕ</sup> *UCL School of Pharmacy, University College London, 29-39 Brunswick Square, London WC1N 1AX, UK.*

<sup>ξ</sup> *Department of Chemistry, University of Sheffield, Sheffield S3 7HF, UK.*

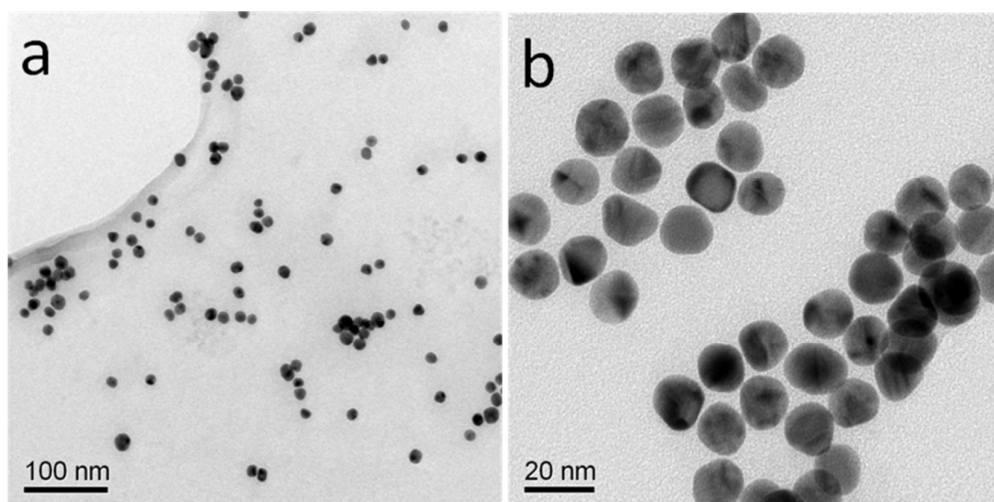

**Figure S1.** Representative TEM images of the citrate stabilised gold nanoparticle (mean diameter ~14 nm) used in this study under low (a) and high (b) magnifications.

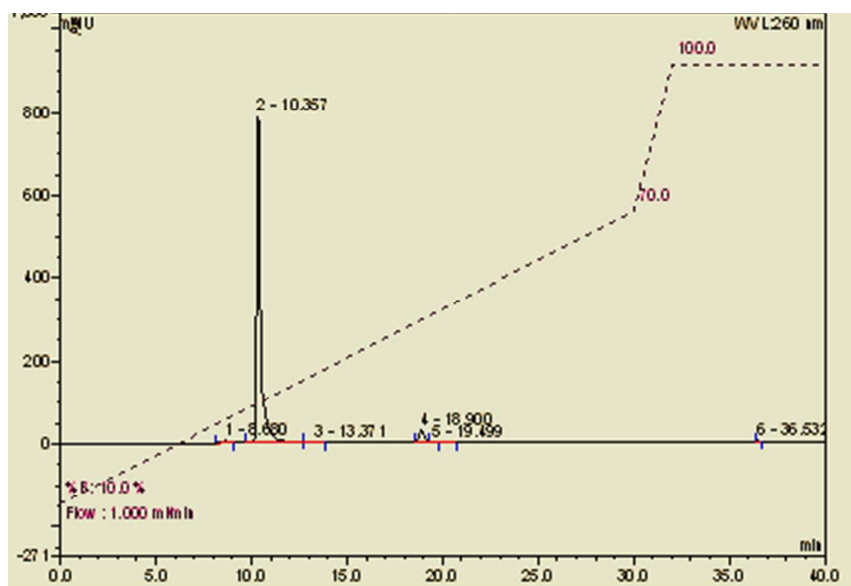

**Figure S2.** A typical HPLC eluting profile of the MC2-SH.

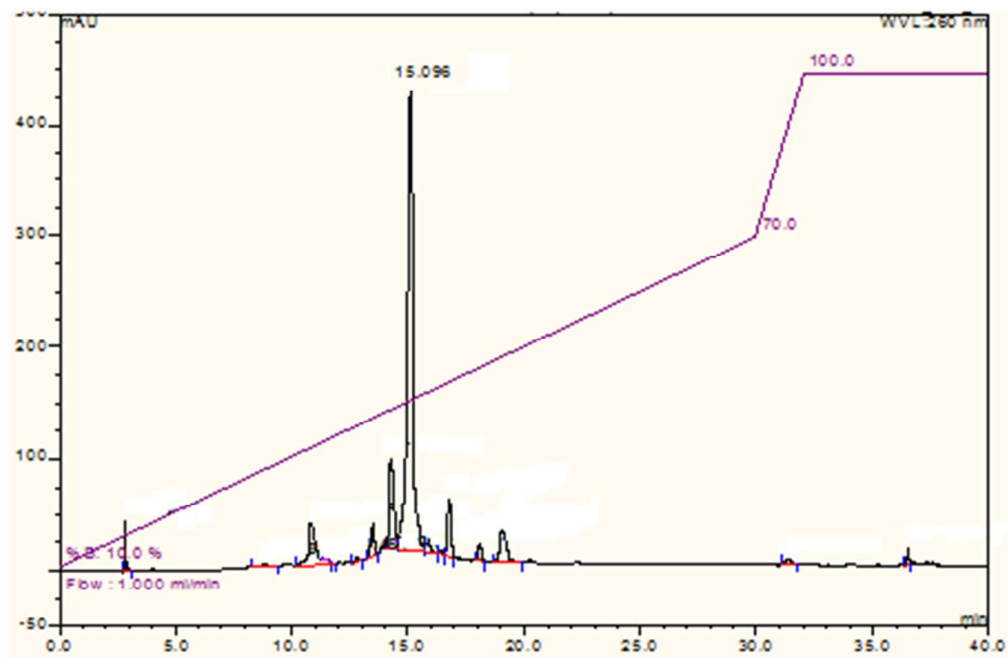

**Figure S3.** A typical HPLC eluting profile of the prepared MC2(EG<sub>12</sub>)<sub>3</sub> before purification. The dominate peak with a retention time of 15.096 min is found to be the desired MC2(EG<sub>12</sub>)<sub>3</sub> product, confirming a high conversion rate of the MC2-SH into the desired product.

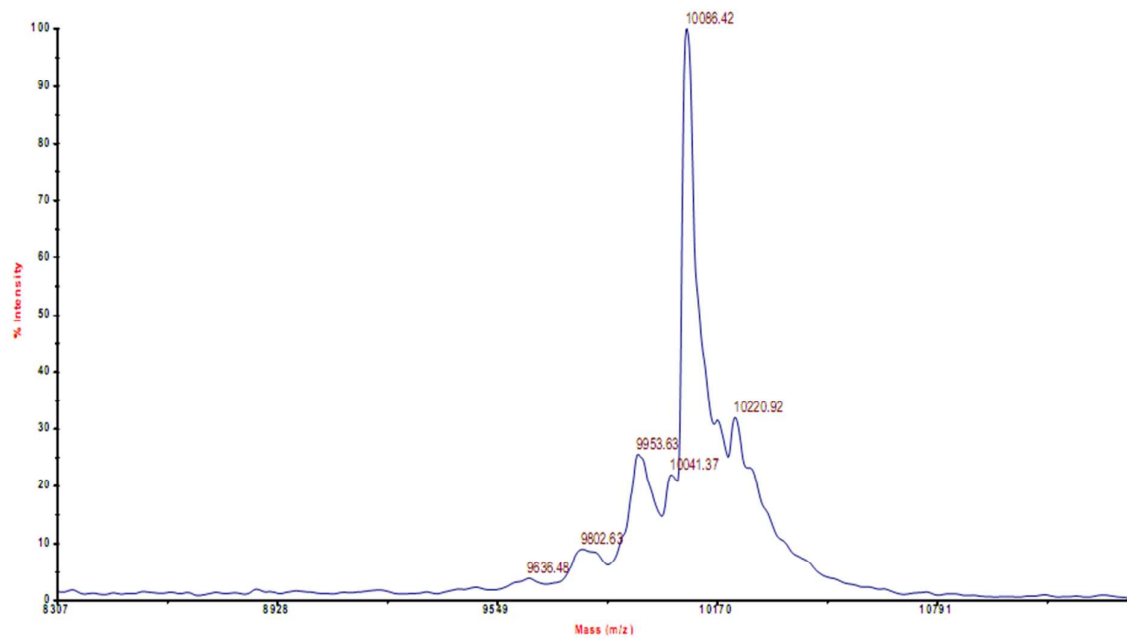

**Figure S4.** MALDI-TOF MS spectrum of the purified MC2(EG<sub>12</sub>)<sub>3</sub>. The main peak 10086 (10041 + 2Na<sup>+</sup> - H) matches the expected molecular weight of the desired MC2(EG<sub>12</sub>)<sub>3</sub> (10041) product.
